# Supplementary material for: The Onset and Progression of Myopia Slows in Chinese 15-Year-Old Adolescents Following Vocational Rather Than Academic School Pathways
Source: PubMed Central journal article supplement (PMC11364183; doi:10.1167/iovs.65.10.42), 2024-08-28
Supplement: iovs-65-10-42_s001.pdf [file iovs-65-10-42_s001.pdf]

Supplemental information

**The onset and progression of myopia slows in Chinese 15-year-old adolescents following vocational rather than academic school pathways**

Yin Hu, Ian G Morgan, Ling Jin, Mingguang He, Xiaohu Ding

Supplementary table S1. The original data on annual change in spherical equivalent refraction, stratified by myopia status and high school type.

|       | Myopes                    |                         | Non-myopes                |                         |
|-------|---------------------------|-------------------------|---------------------------|-------------------------|
|       | Vocational<br>(N, M ± SD) | Academic<br>(N, M ± SD) | Vocational<br>(N, M ± SD) | Academic<br>(N, M ± SD) |
| 7-8   | only one record           | 3, -0.75 ± 0.33         | 8, 0.01 ± 0.29            | 37, -0.32 ± 0.44        |
| 8-9   | 8, -0.80 ± 0.49           | 21, -1.04 ± 0.65        | 42, -0.29 ± 0.37          | 92, -0.38 ± 0.48        |
| 9-10  | 21, -0.80 ± 0.38          | 54, -0.89 ± 0.46        | 69, -0.38 ± 0.45          | 145, -0.48 ± 0.50       |
| 10-11 | 43, -0.82 ± 0.39          | 109, -0.84 ± 0.40       | 78, -0.37 ± 0.40          | 163, -0.48 ± 0.61       |
| 11-12 | 66, -0.67 ± 0.45          | 174, -0.72 ± 0.51       | 83, -0.35 ± 0.35          | 139, -0.40 ± 0.41       |
| 12-13 | 102, -0.56 ± 0.44         | 234, -0.57 ± 0.47       | 88, -0.29 ± 0.46          | 140, -0.30 ± 0.38       |
| 13-14 | 129, -0.47 ± 0.39         | 287, -0.51 ± 0.42       | 77, -0.16 ± 0.41          | 143, -0.30 ± 0.45       |
| 14-15 | 154, -0.41 ± 0.38         | 348, -0.37 ± 0.38       | 79, -0.12 ± 0.33          | 128, -0.21 ± 0.36       |
| 15-16 | 173, -0.24 ± 0.38         | 397, -0.32 ± 0.44       | 83, -0.11 ± 0.30          | 117, -0.18 ± 0.35       |
| 16-17 | 179, -0.15 ± 0.38         | 405, -0.25 ± 0.34       | 78, 0.00 ± 0.29           | 89, -0.07 ± 0.31        |
| 17-18 | 159, -0.13 ± 0.32         | 382, -0.24 ± 0.35       | 63, -0.12 ± 0.41          | 80, -0.16 ± 0.29        |

Supplementary table S2. The original data of annual change in axial length, stratified by myopia status and high school type.

|       | myopia                    |                         | Non-myopia                |                         |
|-------|---------------------------|-------------------------|---------------------------|-------------------------|
|       | Vocational<br>(N, M ± SD) | Academic<br>(N, M ± SD) | Vocational<br>(N, M ± SD) | Academic<br>(N, M ± SD) |
| 7-8   | only one record           | 3, 0.43 ± 0.20          | 8, 0.12 ± 0.04            | 37, 0.28 ± 0.22         |
| 8-9   | 8, 0.50 ± 0.14            | 21, 0.55 ± 0.24         | 42, 0.28 ± 0.24           | 92, 0.26 ± 0.19         |
| 9-10  | 21, 0.45 ± 0.22           | 54, 0.44 ± 0.18         | 69, 0.25 ± 0.17           | 145, 0.30 ± 0.18        |
| 10-11 | 43, 0.39 ± 0.18           | 109, 0.42 ± 0.13        | 78, 0.22 ± 0.16           | 163, 0.29 ± 0.29        |
| 11-12 | 66, 0.35 ± 0.15           | 174, 0.34 ± 0.24        | 83, 0.22 ± 0.13           | 139, 0.23 ± 0.14        |
| 12-13 | 102, 0.28 ± 0.17          | 234, 0.29 ± 0.15        | 88, 0.15 ± 0.16           | 140, 0.20 ± 0.15        |
| 13-14 | 129, 0.22 ± 0.14          | 287, 0.25 ± 0.12        | 77, 0.11 ± 0.13           | 143, 0.16 ± 0.13        |
| 14-15 | 154, 0.18 ± 0.13          | 348, 0.18 ± 0.12        | 79, 0.09 ± 0.10           | 128, 0.12 ± 0.11        |
| 15-16 | 173, 0.11 ± 0.13          | 397, 0.15 ± 0.12        | 83, 0.05 ± 0.09           | 117, 0.08 ± 0.09        |
| 16-17 | 179, 0.06 ± 0.12          | 405, 0.13 ± 0.12        | 78, 0.02 ± 0.07           | 89, 0.07 ± 0.09         |
| 17-18 | 159, 0.06 ± 0.11          | 382, 0.10 ± 0.10        | 63, 0.04 ± 0.07           | 80, 0.07 ± 0.08         |

Supplementary table S3. Estimated piecewise linear mixed effects model relating spherical equivalent and axial length to age, stratified by myopia status and high school type.

|                                      | Spherical equivalent   |                     |                     | Axial length        |                        |                     |
|--------------------------------------|------------------------|---------------------|---------------------|---------------------|------------------------|---------------------|
|                                      | $Age_{i,j}$            | $Age_{i,j} - 12$    | --                  | $Age_{i,j}$         | $Age_{i,j} - 12$       | --                  |
|                                      | $\beta_2$ (95%CI)      | $\beta_2$ (95%CI)   | $\beta_2 + \beta_3$ | $\beta_2$ (95%CI)   | $\beta_2$ (95%CI)      | $\beta_2 + \beta_3$ |
| Non-myopes in vocational high school | -0.25 (-0.28 to -0.23) | 0.17 (0.14 to 0.20) | -0.08               | 0.20 (0.19 to 0.21) | -0.13 (-0.14 to 0.11)  | 0.07                |
| Non-myopes in academic high school   | -0.23 (-0.25 to -0.21) | 0.10 (0.07 to 0.12) | -0.13               | 0.20 (0.19 to 0.21) | -0.10 (-0.11 to -0.09) | 0.10                |
| P                                    | 0.030                  | 0.020               | --                  | 0.370               | 0.010                  | --                  |
| Myopes in vocational high school     | -0.77 (-0.83 to -0.72) | 0.46 (0.41 to 0.51) | -0.31               | 0.42 (0.40 to 0.45) | -0.28 (-0.30 to -0.26) | 0.12                |
| Myopes in academic high school       | -0.83 (-0.86 to -0.79) | 0.48 (0.45 to 0.52) | -0.35               | 0.42 (0.41 to 0.44) | -0.25 (-0.27 to -0.24) | 0.17                |
| P                                    | 0.420                  | 0.180               | --                  | 0.160               | 0.020                  | --                  |

$\beta_2$  = the slope (D/yr) of SE when age is less than 12 years

$\beta_3$ : the change in the slope of SE at the age of 12 years

$\beta_2 + \beta_3$  = the slope(D/yr) of SE after age 12 years.
